# Supplementary material
Source: PubMed Central journal article supplement (PMC3163929)
Supplement: 97320630007029S1.pdf [file 97320630007029S1.pdf]

## Supplementary material:

**Table 1:** Eight probable mouse remote homologue clusters of *Drosophila* GAGA factor. The table shows name of gene with synonyms, size of amino acids (AA) and uniprot ID. The table also shows the pair wise identity of mouse BTB, ZNF and both domains with *Drosophila* GAGA factor by the Needleman-Wunsch alignment algorithm method using EMBOSS programme.

| S.No | Name                      | Size (AA) | Uniprot ID | BTB (%) | ZNF (%) | Both (%) |
|------|---------------------------|-----------|------------|---------|---------|----------|
| 1    | <b>Zbtb3</b>              | 518       | Q91X45     | 31.1    | 17      | 14.4     |
| 2    | <b>Zbtb32</b> Rog Tzfp    | 465       | Q9JKD9     | 27.3    | 8.1     | 14.5     |
| 3    | <b>Zbtb44</b> Btbd15      | 453       | Q8R0A2     | 29.7    | 17      | 14.3     |
| 4    | <b>Zbtb7b</b> Thpok       | 544       | Q64321     | 25      | 7.4     | 14.4     |
| 5    | <b>Zbtb43</b> Kiaa0414    | 467       | Q9DAI4     | 33.8    | 5.9     | 13.4     |
| 6    | <b>Zbtb8b</b>             | 484       | Q8CII0     | 27.1    | 14.9    | 13.9     |
| 7    | <b>Znf238</b> Rp58 Zfp238 | 522       | Q9WUK6     | 32.4    | 9.7     | 15.7     |
| 8    | <b>Bcl6b</b> Bazf         | 474       | O88282     | 29.4    | 5.2%    | 14.8     |
